# Supplementary material
Source: MDPI journal article supplement (https://www.mdpi.com/2079-9292/9/3/525)
Supplement: s1 [file s1]

**Supplementary Materials:** The following are available online at <http://www.mdpi.com/2079-9292/9/3/525/s1>.

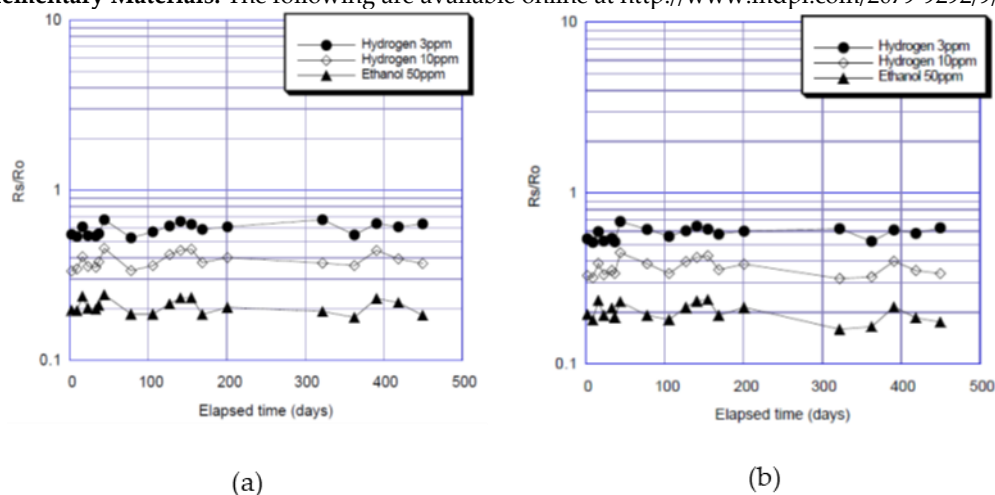

**Figure S1.** (a) Long-term stability of sensor TGS2600 when the sensor is continuous energizing [15].  
(b) Long-term stability of sensor TGS2600 when the sensor is unenergized between measures [15].

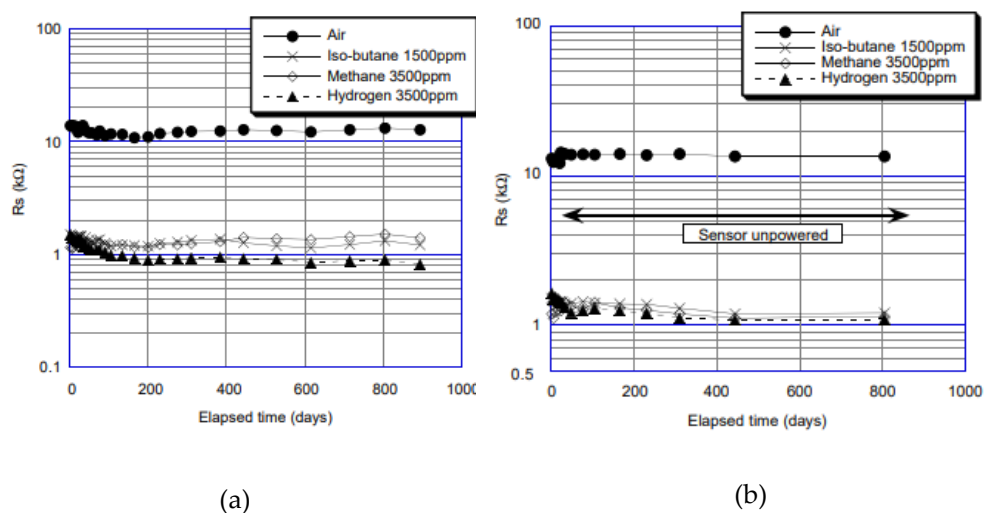

**Figure S2.** (a) Long-term stability of sensor TGS2610 when the sensor is continuous energizing [16].  
(b) Long-term stability of sensor TGS2610 when the sensor is unenergized between measures [16].

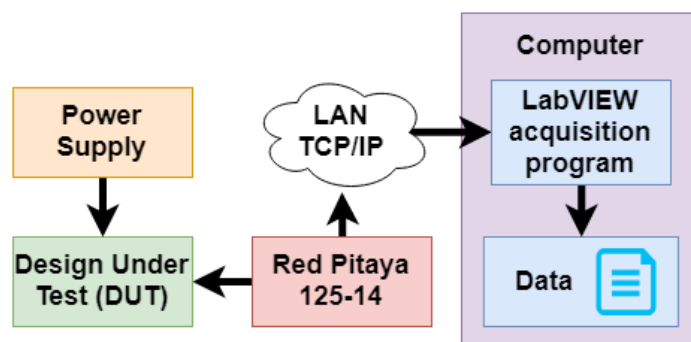

**Figure S3.** Acquisition system.

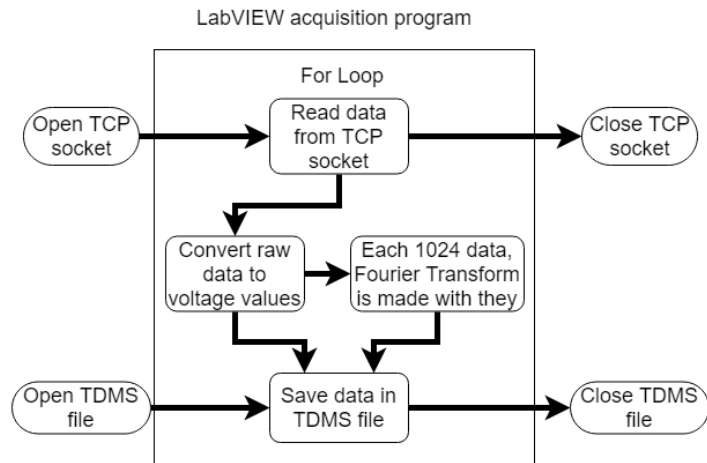

**Figure S4.** Acquisition program made in LabVIEW to store all data.

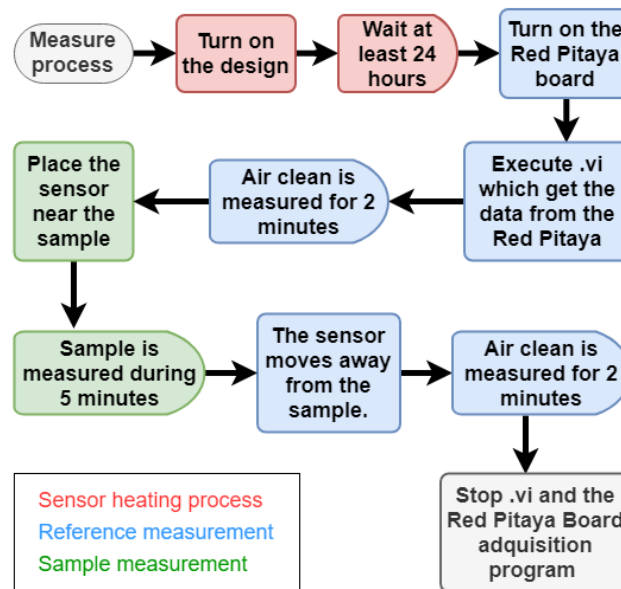

**Figure S5.** Measurement process steps.

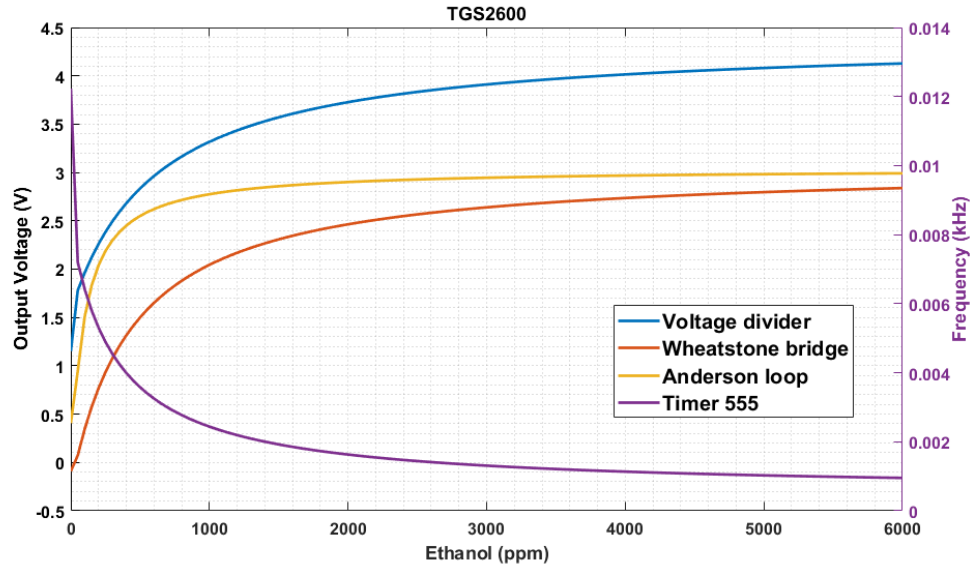

Figure S6. Output models for each topology using the TGS2600 sensor.

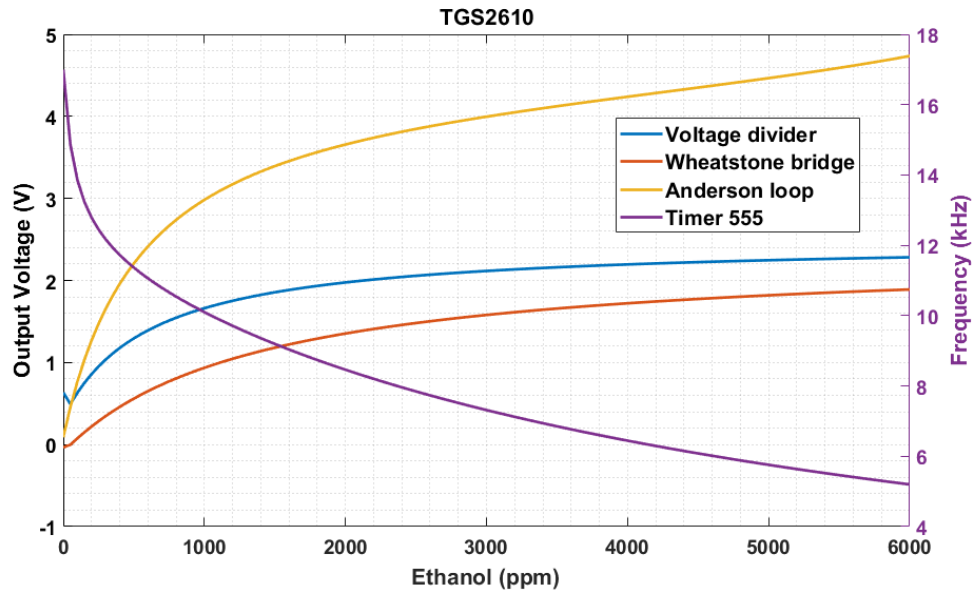

Figure S7. Output models for each topology using the TGS2600 sensor.
